# Supplementary material for: Functional Characterization of a Dendrobium officinale Geraniol Synthase DoGES1 Involved in Floral Scent Formation
Source: PubMed Central journal article supplement (PMC7582308; doi:10.3390/ijms21197005), 2020-09-23
Supplement: ijms-21-07005-s001.pdf [file ijms-21-07005-s001.pdf]

## Supplementary Materials

# Functional characterization of a *Dendrobium officinale* geraniol synthase DoGES1 involved in floral scent formation

Conghui Zhao<sup>1,2,†</sup>, Zhenming Yu<sup>1,3,†</sup>, Jaime A. Teixeira da Silva<sup>4</sup>, Chunmei He<sup>1</sup>, Haobin Wang<sup>1</sup>, Can Si<sup>1</sup>, Mingze Zhang<sup>1</sup>, Danqi Zeng<sup>1</sup> and Jun Duan<sup>1,3,\*</sup>

<sup>1</sup> Key Laboratory of South China Agricultural Plant Molecular Analysis and Genetic Improvement & Guangdong Provincial Key Laboratory of Applied Botany, South China Botanical Garden, Chinese Academy of Sciences, Guangzhou 510650, China; zhaoconghui@scbg.ac.cn (C.Z.); zhenming311@scbg.ac.cn (Z.Y.); hechunmei2012@scbg.ac.cn (C.H.); wanghaobin17@scbg.ac.cn (H.W.); cans2013@163.com (C.S.); zhangmingze@scbg.ac.cn (M.Z.); (D.Z.)

<sup>2</sup> University of Chinese Academy of Sciences, No. 19A Yuquan Road, Beijing 100049, China

<sup>3</sup> Center of Economic Botany, Core Botanical Gardens, Chinese Academy of Sciences, Guangzhou 510650, China

<sup>4</sup> Independent researcher, P. O. Box 7, Miki-cho post office, Ikenobe 3011-2, Kagawa-ken, 761-0799, Japan; jaimetex@yahoo.com

\* Correspondence: duanj@scib.ac.cn; Tel.: +86-020-37252978

† These authors contributed equally to this work.

### Supplementary Table legends

**Table S1.** Three candidate GES sequences from the *D. officinale* genome.

**Table S2.** The reported TPS proteins from other plant species used in the phylogenetic analysis.

**Table S3.** Gene-specific primers used in the experiments.

### Supplementary Figure legends

**Figure S1.** Transcription levels of *DoGES1*, *DoGES2*, and *DoGES3* in different *D. officinale* tissues.

**Figure S2.** Agarose gel electrophoresis of cDNA amplification of the *DoGES1* gene.

**Figure S3.** SDS-PAGE analysis of DoGES1 recombinant protein expressed in *Escherichia coli* BL21.

**Figure S4.** Content of geraniol in semi-open *D. officinale* flowers at 8:00, 11:00, 14:00, and 17:00.

**Figure S5.** Putative regulatory *cis*-elements in the *DoGES1* promoter.

**Figure S6.** Different developmental stages of *D. officinale* 'Zhongke 5' flowers.

**Table S1.** Three candidate GES sequences from the *D. officinale* genome.

| Name   | Sequences                                                                                                                                                                                                                                                                                                                                                                                                                                                                                                                                                                                                                              |
|--------|----------------------------------------------------------------------------------------------------------------------------------------------------------------------------------------------------------------------------------------------------------------------------------------------------------------------------------------------------------------------------------------------------------------------------------------------------------------------------------------------------------------------------------------------------------------------------------------------------------------------------------------|
| DoGES1 | MEEELRPCRFSLLLAEQTMQRLADGAAFSTPVSRRSANYQPSLWDDNYIQSL<br>PDGSLDATQVNLWEKLKEEVRHLIDQNKQNDTIELLEYVNTLCQLGISYHFESIKNVLT<br>FIASSMESLSNILKNSLHGSALLFRLREYGIKALNTREDFLVRSFKNENGSGF<br>KVHIVNDVKGMLSLYEASYLSVEGEDDLDEAMEFTTKHLSNYLKEPSLIHPSLVEQ<br>ISHALHLPLHWRMPTLHTMWFIDTYEKQENTNYSLFEFAKLDFNMVQSIYKKEV<br>KEMSSWRSIGLAGDEFSFARDRLMENYFWAMGCALEPHFWRCRKEITKLVSIIIT<br>TIDDIYDTYGSIEELVFTNAVDEWKIIEIQSLPNCMRKALLTLINTMNEIAFAFSKE<br>KGLDILPQLKRPWGYQCKAYLVEAIWYNTRYIPTLNEYMENAWLSIGTALVLT<br>VAYLLEDLTKEALNSLELYFDVTRYSCMITRLYDDLGTSTDELQRGDIPKSIQCYM<br>NETNVSEVVARDHIRKLIKKYWKLFNGEYFSNFNLEESFKRYALNLPMAQCIYQ<br>YGDGYGKPDRETRDRIISLIKPIPL |
| DoGES2 | MEGDLQSSPPSRRSANYQPTLWDDSYIQSLPDSSLDAAQVNLWEKLNEEVRHLID<br>HTKQKDIIELLELEYVNTLCQLGISYHFESIKNVLTFIASSMESLSNILKNSLHGSALLF<br>RLLREYGIKALNTREDFLVRSFKNENGSGFKVHIVNDVKGMLSLYEASYLSVEGED<br>DLDEAMEFTTKHLSNYLKEPLLIHPSLVEQISHALELPLHWRMPRLHTRWFIDAY<br>ERQENMNHSLLEFAKLDFNMVQSICKKEVKEMSSWRSIGLAGDEFSFARDRLM<br>ENYFWTMGCTFEPHFWRRCRKEITKLASLITIDDIYDIYGSVEELMLFTNAVNEWK<br>ITEIQSLPNCMRKALLAIINTMNDTACAFSKEKGLDILPQLKQAWGDQCKAYLVE<br>AIWYNTRYIPTLNEYMENAWLSVAISLVINAAYLLEDLTKEALNSLELYFDVTRY<br>SSMVTRLYDDLGTSTDELQRGDVPKSIQCYMNETNVSEFVARDHIRQLIKKYWRL<br>FNGEYFSNFNLEESFKRYALNLPMAQCIYQYGDGYGKPDRETRDKIISLIKPIPL                        |
| DoGES3 | MEGDLPSPPSRRSANYQPSLWDDSYIQSLPDSSLDATQINLWEKLNKEARHLIEH<br>NKQKDIIELLE YINTLCQLGISYHFESIKNVLTLIASSIENLSNILKNSLHGSALLFRL<br>LREYGIKALNTSEDFLVRSFKNENGSGFKVHIVNDVKGMLSLYEASYLSVEGEDDL<br>EAMEFTIKHLSNYLKEPLLIHPSLVKQISHAIELPLHWRSRPLHTRWFIDAYERQEN<br>MNPSLLEFAKLDFNMVQSICKKEVKEMSSWRRSIGLASDEFSFARDRLMENYFWI<br>MGCTFEPHFWRRCRKEITKFASLISTIDDIYDIYGSVEELVFTNAVDEWKIIEIQSLP<br>NCMKTTLLALINTMNDIACAFLKEKGLDILPQLKRAWGDQCKAYLVEAIWYNT<br>RYTPTLNEYMDNAWLSAAVPLVLTAAYLLEDLTQALNSLQFYFDVTRYSSMV<br>ARLYDDLETSTDELQRGDVPKSIQCYMNETNVLESVARDHIRQLIKKYWKLNGE<br>YFSNFNLEESFKRYALNLPMAQCIYQYGDGYGKPDRETKDRIISLIKPIPL                            |

**Table S2.** The reported TPS proteins from other plant species used in the phylogenetic analysis.

| <b>Species</b>              | <b>TPS</b>                                                       | <b>Accession ID in NCBI</b> |
|-----------------------------|------------------------------------------------------------------|-----------------------------|
| <i>Santalum album</i>       | Monoterpene synthase                                             | ACF24767                    |
| <i>S. album</i>             | $\beta$ -bisabolene synthase                                     | AIV42941                    |
| <i>S. austrocaledonicum</i> | $\beta$ -bisabolene synthase                                     | ADO87003                    |
| <i>S. spicatum</i>          | $\alpha$ -bisabolol synthase                                     | E3W206                      |
| <i>Malus domestica</i>      | $\alpha$ -farnesene synthase                                     | AAX19772                    |
| <i>Prunus dulcis</i>        | Geraniol synthase                                                | QEE82241                    |
| <i>P. dulcis</i>            | ( <i>E,E</i> )- $\alpha$ -farnesene synthase                     | QEE82244                    |
| <i>Ocimum basilicum</i>     | Geraniol synthase                                                | AY362553                    |
| <i>O. basilicum</i>         | <i>R</i> -linalool synthase                                      | AAV63789                    |
| <i>Vitis vinifera</i>       | (-)- $\alpha$ -terpineol synthase                                | AAS79352                    |
| <i>Arabidopsis thaliana</i> | $\beta$ -caryophyllene/ $\alpha$ -humulene synthase              | AAO85539                    |
| <i>Cucumis sativus</i>      | ( <i>E,E</i> )- $\alpha$ -farnesene synthase                     | Q66PX9                      |
| <i>Fragaria vesca</i>       | Germacrene D synthase                                            | LOC101314066                |
| <i>S. album</i>             | Sesquiterpene synthase                                           | ACF24768                    |
| <i>S. spicatum</i>          | Sesquiterpene synthase                                           | E3W208                      |
| <i>A. thaliana</i>          | <i>S</i> -(+)-linalool synthase                                  | Q84UV0                      |
| <i>Antirrhinum majus</i>    | nerolidol/linalool synthase 1                                    | ABR24417                    |
| <i>V. vinifera</i>          | (3 <i>S</i> )-linalool/( <i>E</i> )-nerolidol synthase           | ADR74212                    |
| <i>Camellia sinensis</i>    | ( <i>E</i> )-nerolidol synthase                                  | KY033151                    |
| <i>Pinus abies</i>          | ( <i>E</i> )- $\alpha$ -bisabolene synthase                      | Q675L6                      |
| <i>Abies grandis</i>        | ( <i>E</i> )- $\alpha$ -bisabolene synthase                      | AAC24192                    |
| <i>P. taeda</i>             | $\alpha$ -farnesene synthase                                     | Q84KL5                      |
| <i>P. abies</i>             | (-)-linalool synthase                                            | Q675L2                      |
| <i>P. taeda</i>             | (-)- $\alpha$ -terpineol synthase                                | Q84KL4                      |
| <i>Solanum lycopersicum</i> | Copalyl diphosphate synthase                                     | BAA84918                    |
| <i>Oryza sativa</i>         | <i>ent</i> -copalyl diphosphatesynthase1                         | Q6ET36                      |
| <i>S. lycopersicum</i>      | <i>ent</i> -kaurene synthase                                     | AEP82778                    |
| <i>O. sativa</i>            | Kaurene synthase 1                                               | Q0JA82                      |
| <i>S. habrochaites</i>      | Santalene and bergamotene synthase                               | ACJ38409                    |
| <i>Clarkia breweri</i>      | Linalool synthase 2                                              | AAD19840                    |
| <i>V. vinifera</i>          | P( <i>E</i> )-nerolidol/( <i>E,E</i> )-geranyl linalool synthase | NP001268004                 |
| <i>Actinidia deliciosa</i>  | Terpene synthase                                                 | ACO40485                    |

**Table S3.** Gene-specific primers used in the experiments

| Name               | Sequences (5'→3')                             | Description                      |
|--------------------|-----------------------------------------------|----------------------------------|
| DoGES1-F           | ATGGAGGAAGAACTTCGCCCCG                        | Gene cloning                     |
| DoGES1-R           | TAGAGGAATGGGCTTAATTA                          |                                  |
| DoGES1-32a-F       | GGCTGATATCGGATCCTATGGAGGAAGAACTTCGCCCCG       | pET32a vector construction       |
| DoGES1-32a-R       | GTGCGGCCGCAAGCTTTAGAGGAATGGGCTTAATTA          |                                  |
| DoGES1-3300-F      | CTCGGTACCCGGGGATCCTATGGAGGAAGAACTTCGCCCCG     | pCAMBIA 3300 vector construction |
| DoGES1-3300-R      | GGCCAGTGCCAAGCTTTAGAGGAATGGGCTTAATTA          |                                  |
| DoGES1-YFP-F       | ATTTACGAACGATAGCCATGGCTATGGAGGAAGAACTTCGCCCCG | YFP vector construction          |
| DoGES1-YFP-R       | AGATCTGAGTCCGGACCATGGTTAGAGGAATGGGCTTAATTA    |                                  |
| DoGES1-qRT-PCR-F   | GCCTTTACGAGGCTTCTTATCT                        | qRT-PCR analysis                 |
| DoGES1-qRT-PCR-R   | TTGTTCCACTAACGAGGGATG                         |                                  |
| DoGES2-qRT-PCR-F   | GCTTATGAGAGGCAAGAGAACA                        | qRT-PCR analysis                 |
| DoGES2-qRT-PCR-R   | CCACCAACTAGACATCTCCTTAAC                      |                                  |
| DoGES3-qRT-PCR-F   | TGATGCTTATGAGAGGCAAGAG                        | qRT-PCR analysis                 |
| DoGES3-qRT-PCR-R   | TCATCGCTAGCAAGACCAATAC                        |                                  |
| DoEF-1 $\alpha$ -F | GCTTGAGAAGGAGCCCAAGT                          | qRT-PCR analysis                 |
| DoEF-1 $\alpha$ -R | CCAACAGCCACAGTTTGTCC                          |                                  |

Gene-specific primers for real-time quantitative reverse transcription PCR (qRT-PCR) were designed by the PrimerQuest online tool (<http://www.idtdna.com/Primerquest/Home/Index>). The *D. officinale* actin gene (DoEF-1 $\alpha$ ) was obtained from NCBI (JF825419). F, forward; R, reverse.

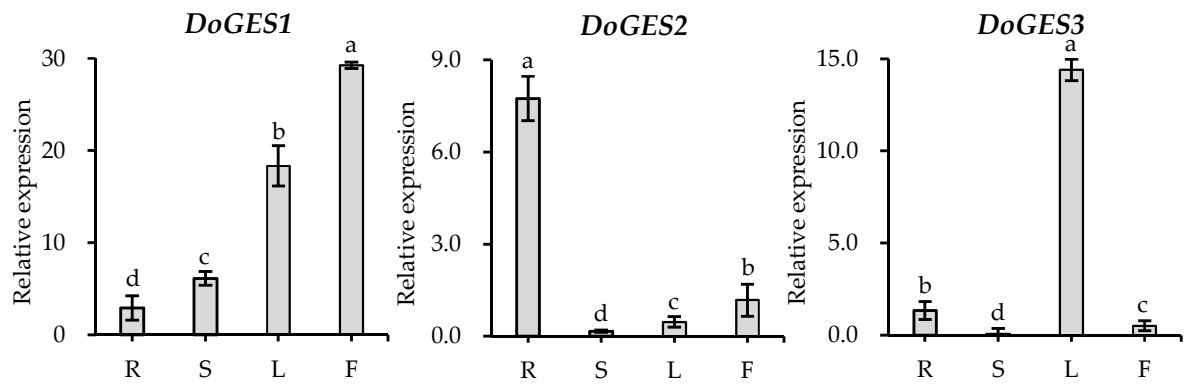

**Figure S1.** Transcription levels of *DoGES1*, *DoGES2*, and *DoGES3* in different *D. officinale* tissues. Different letters above error bars (standard deviation) ( $n = 10$ ) indicate significant differences between treatments ( $p < 0.05$ , Duncan's multiple range test). R, roots; S, stems; L, leaves; F, flowers.

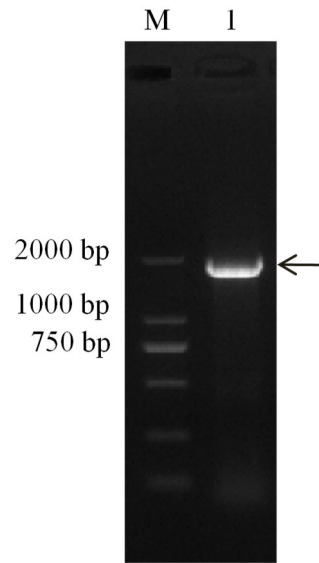

**Figure S2.** Agarose gel electrophoresis of cDNA amplification of the *DoGES1* gene. M, marker D2000 (M122, GenStar Inc., Beijing, China).

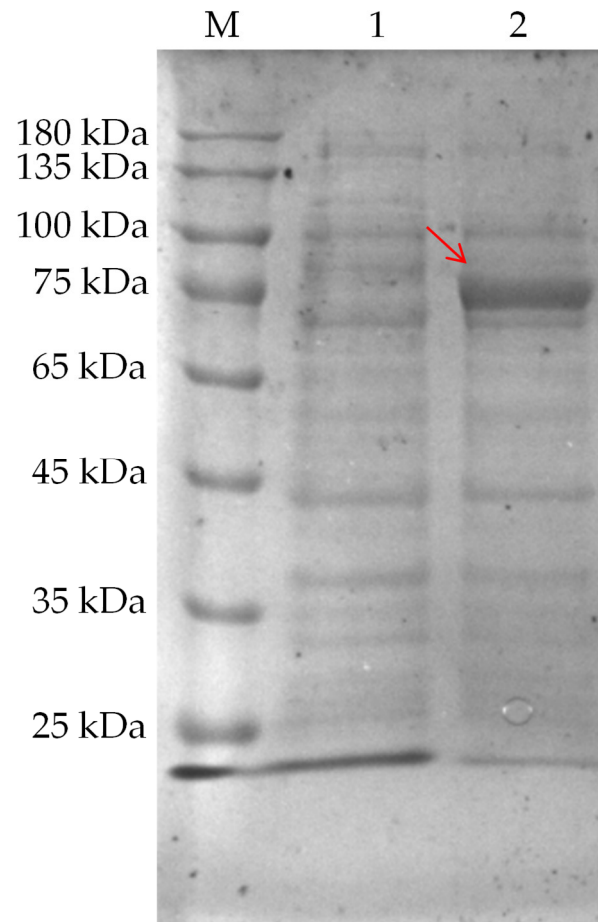

**Figure S3.** SDS-PAGE analysis of DoGES1 recombinant protein expressed in *Escherichia coli* BL21. Lane 1 indicates empty vector pET32a. Lane 2 indicates the elute of pET32a-DoGES1 protein. M indicates protein marker 10-180 kDa (M221, GenStar Inc., Beijing, China).

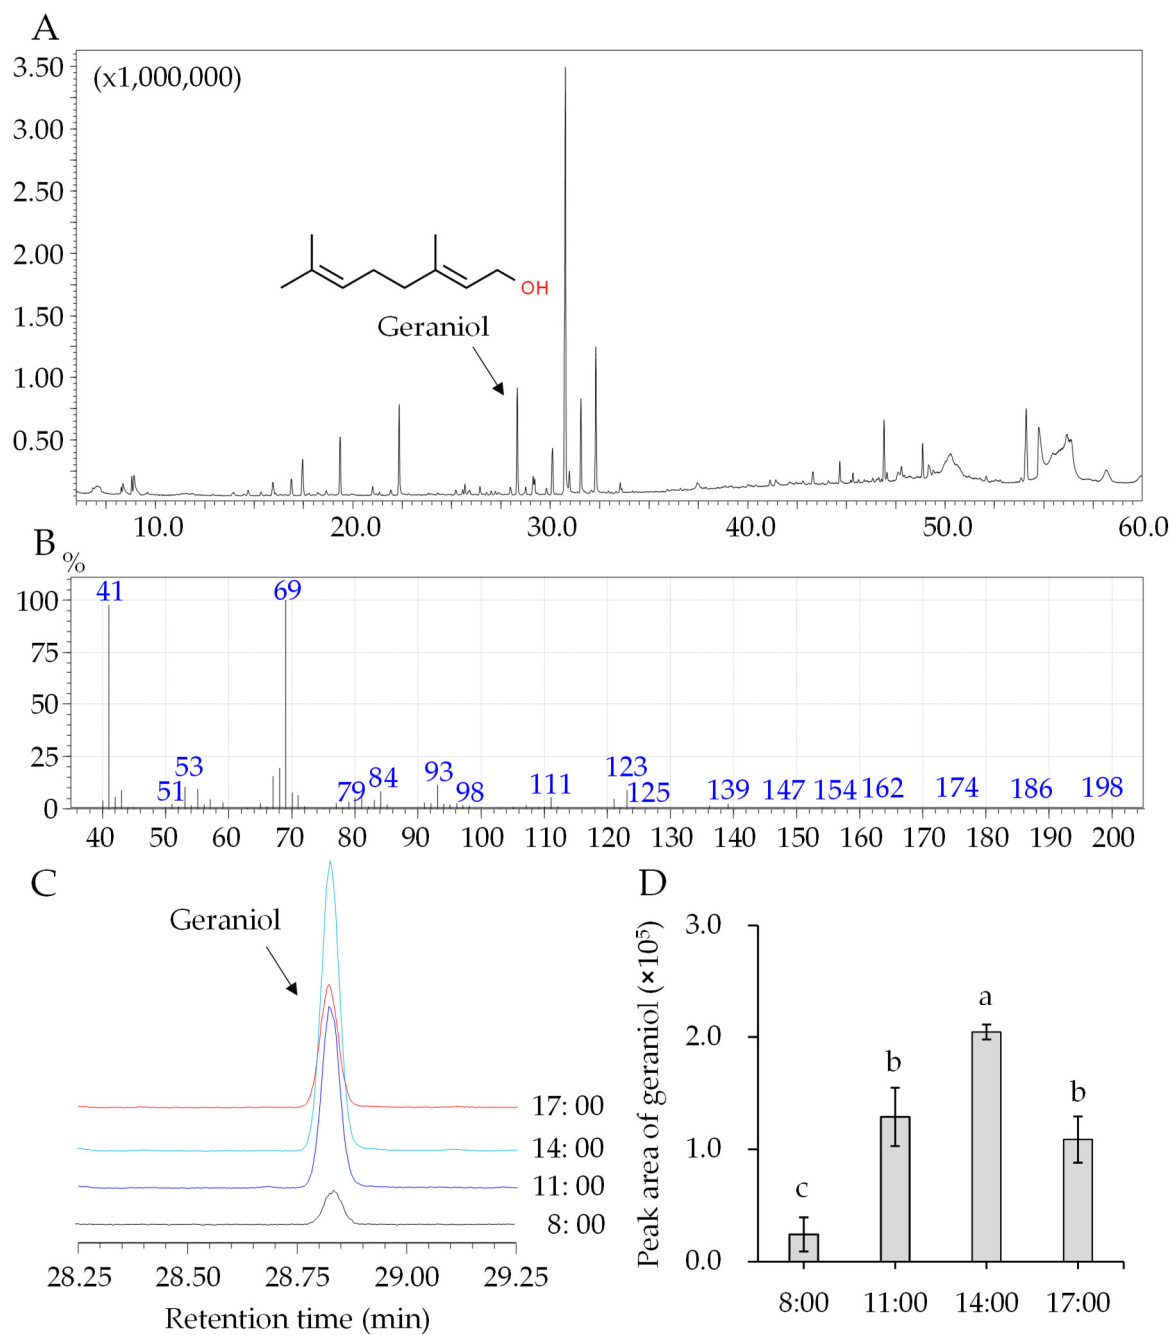

**Figure S4.** Content of geraniol in *D. officinale* semi-open flowers at 8:00, 11:00, 14:00, and 17:00. Each bar represents the mean ( $\pm$  standard error,  $n = 10$ ) of three independent biological replicates. Different letters above the bars indicate significant differences ( $p < 0.05$ , Duncan's multiple range test).



TTGGAGGATTGTAGTCGTCGACCAACGGAGATTGAAGAATCATAATTGAGCGATGATGGTTGACTATCGACGAAGGTT  
AGATTTATCATAGTCGGGCAACTAAGGTTGAAATATCATATTTGGTAGTTGATGGAGGTCGTTAGTATGAAAAGCTTTATAA  
ATGTTTAAATTTAAATAAGATAATATAGTCTTTTGATATTTGTTAATGGAACGTGAATATTTTAAAGACATGTCCTTGAC  
TTTTATGCGCTTTGTTAGTCATTGAATACTATTGTCAAAAATAATTGATATTATAATCTCTTTAAACAATCAAATTTTAGGCAT  
AATTATATTCATCCATATAGATTTATATAATAGTTTAAAAAGTGACAACATAATAAAATTTTAAATTAATTTTACAAA  
ATTTATTTTAAATAAAAATTTAATAATGAAGTCATCTAATTCACCACATATAATTGAAGAGCTAAGAGAAAATAAAAAAAA  
GGAGGGAGATTCAAGAGCTAAGAGAAAATAAAGAATTCTCTGTATTTTCCAAGCTATCATCGTCGCTGACTGCGCCAGCA  
GCAATCGCCGCCAGCATTTGTCTGACTTCTATCAATATTTAACTCAGTTATTGAATTTTAAATCATCTCTTATAGATATCAA  
TTTTGTAATTCCTACAAGAAAACCTTGGCAATTGTTCTTAATTCTAAATAATCCTATCTCAGCAAATGTGAAGAAGGGA  
AGATATATTATTGTATCTCATATTAATGCAAAAAATAGGATGATGAAAAGGATACCATAAAAAATTCATACAATCGGCACA  
AATCTCGATATATTTGAATTGAAAACCTTCAAAATGAAGTTTTTGATCATCCAACTTTGAGTTTAAACAACTTATATT  
CGAAGTGAAGTGTTGATGAAAACGAATCTACCGATGCTACAAAATGATTCAATCCAATTCAAAATGAGCTCAAATCAAG  
CTCTTAAGTTATGTTTGGAAAACCTTTTAAATATAAATTAATTGATCGAACAACCTCCAATCAAAGCATGCTCATATTCACT  
CGAGCAACTAACGAGCCAAATCTAACCAAGCACAAAGTCACTTGATTGAAACATGATTAAGACATTCAAATATTGATAA  
ACAATCCACGGTCAACAAGATCAATATGGACTGTACGATGAAATGCCTTGACTTATGGCCAAATTAACCAAAATGTTCA  
TCTCAAAAAGCTTATAAATAGTGCCTATGGAGGTTCAATAGTTGAGAAAATTAATAATTCTCTACTTCTTAACTGT  
GTCATAGCCAACTAACACCACTAACAATTATCATACCACCGCCAAGCTTTTTTCAACATATAGACATATTGTTAGGCTT  
TTTTAATCATCTTTTATGAACATTAAGTTTCTATAATTCCTACAAGAACTCCGATAGTTATTCTCAATCAATAAATAATC  
TCATATTTTCCAACTATGACGAAGGGAAGATTCTTATATCTTATATTATAATGGATTATTATAATTAGGCTAAGCTTCT  
TGGATTTTTTTTTCAATAGACAGGATATTAACAACAATTCTACCGACACAAATTTTTTAGCAAGTAACAGTAGTAATTG  
ATAAAAATTAATAAATAAATGAAATAAAAATTAATAATCACTAAATATTATTGAATTATTGAGAAAATAAATAAAGTCAATA  
CAAAAAGGTTTTTCCAAGTCTTCTTAACTAATCAAGCACTAAAATGAAAATTAGTCTCATTCTGACGGCCATGCAT  
GTAATAATGCTTTTACATTCACGAAATAACATATTAATCGAGTTGGGTGAAAGCAACTTTTGGAAAGGTAAGTCAAATCC  
CAAATTTCTTAATAAATAAACAAGAGCTACAAACAAGTGGGTATAAATTATGATTGAAACAACACTACGTTACAGAGCA  
GAGATATTGCTTCATTAGGCTTTTCCAGCTTTCTTCTTCAATTTCCCTTCTGTATTCTTAAATAAGAAGAAATG (position 0)

**Figure S5.** Putative regulatory *cis*-elements in the DoGES1 promoter. The CGTCA-motif is indicated in red at the -1440 position. The MYC motif is indicated in blue at +675, -731, and -1473 positions. PlantCARE (<http://bioinformatics.psb.ugent.be/webtools/plantcare/html/>) was used for the promoter analysis. The initiation codon of DoGES1 gene (ATG) is set as position 0.

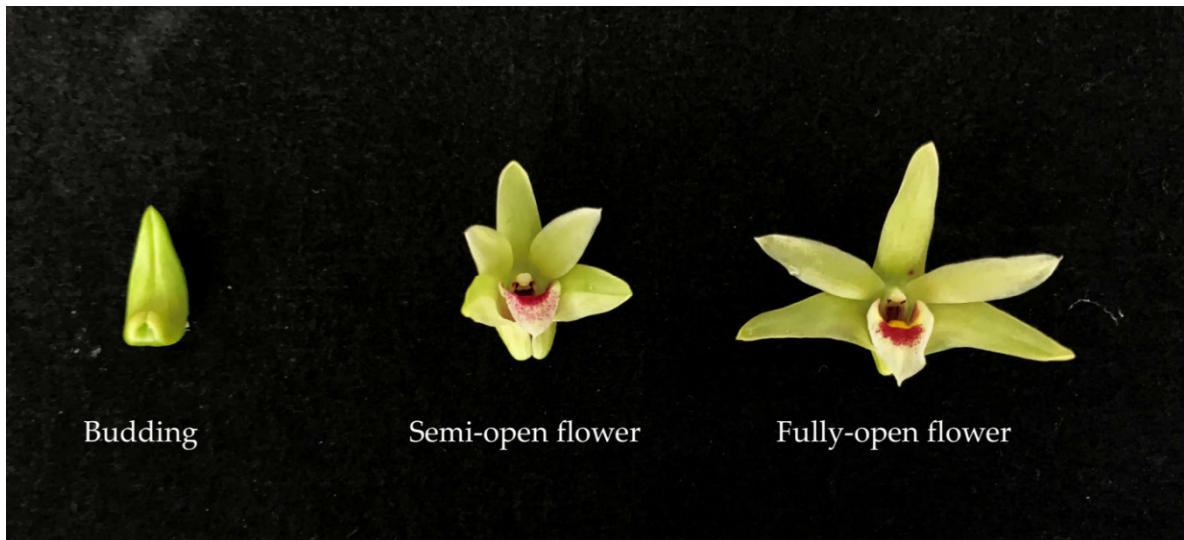

**Figure S6.** Different developmental stages of *D. officinale* 'Zhongke 5' flowers. Three developmental stages of *D. officinale* 'Zhongke 5' flowers, includes budding, semi-open flower, and fully-open flower.
